# Supplementary material
Source: Springer Nature journal article supplement (https://www.springermedizin.de/resource/supplementary/13058_2010_9525_MOESM10_ESM.pdf/9702292)

A

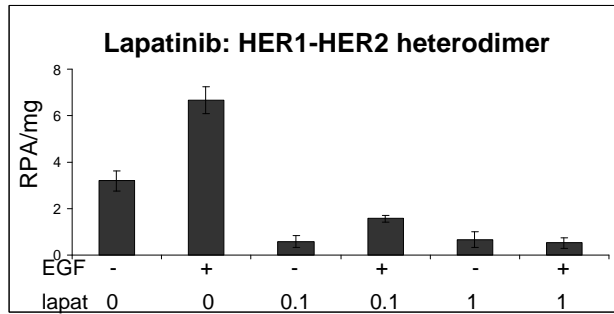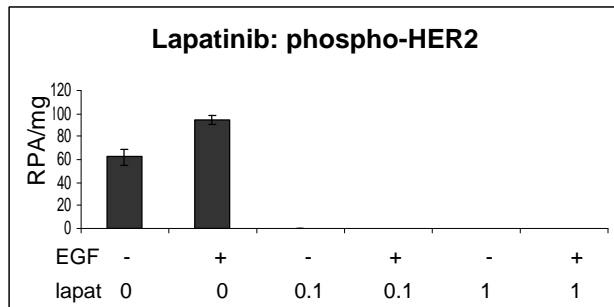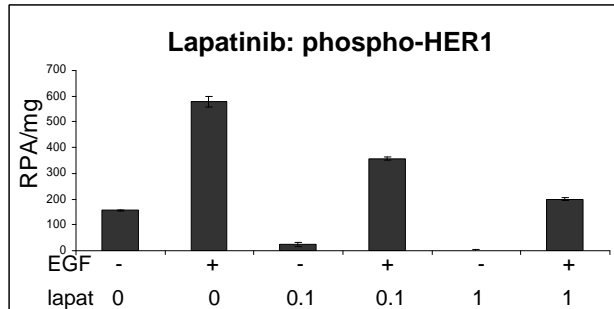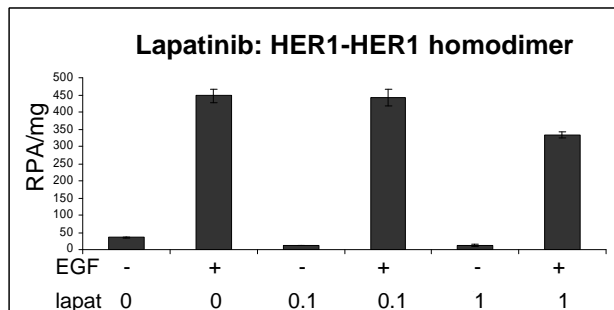

B

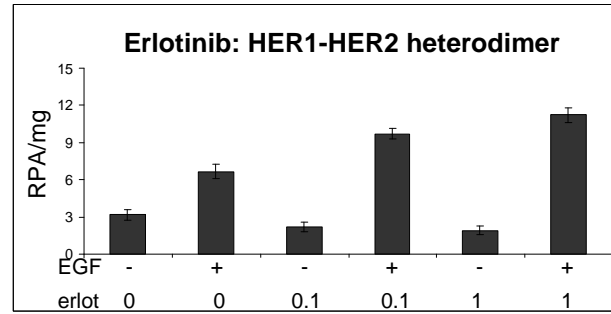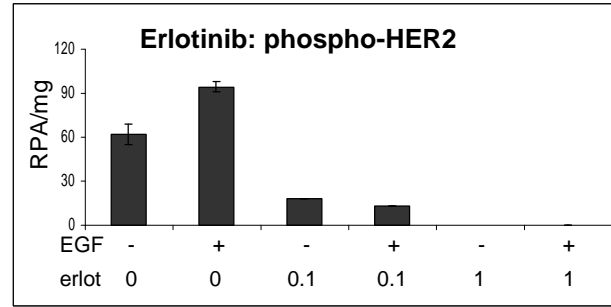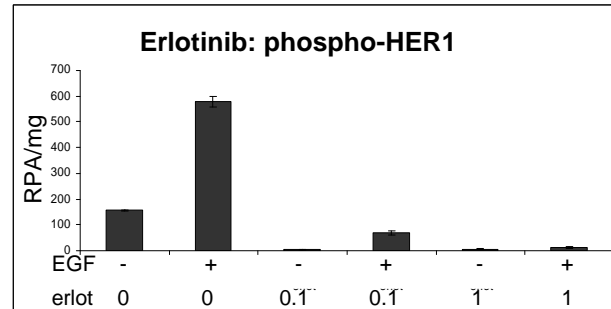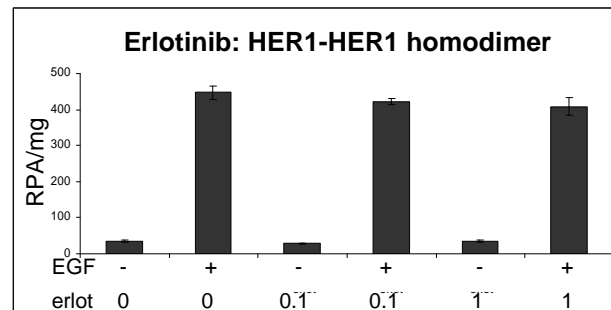

Supplement: MOESM10 [file 9702292]
